# Supplementary material
Source: PubMed Central journal article supplement (PMC9394171)
Supplement: NIHMS1776724-supplement-1776724_Sup_Tables.pdf [file NIHMS1776724-supplement-1776724_Sup_Tables.pdf]

| ID | Gene   | Type        | VAF    | Amino Acid Change  | Nucleotide Change            | Chromosome | StartPosition | Coverage | TotalCoverage | RefCoverage | AltCoverage | Variant Assessment                                                                                                                                                                                                            |
|----|--------|-------------|--------|--------------------|------------------------------|------------|---------------|----------|---------------|-------------|-------------|-------------------------------------------------------------------------------------------------------------------------------------------------------------------------------------------------------------------------------|
| 1  | DNMT3A | Frameshift  | 12.2%  | p.W860Nfs*22       | NM_022552.4:c.2577_2578msAA  | 2          | 25458595      | 869      | 763           | 106         |             | This frameshift alteration has not been previously reported to our knowledge, but it is expected to be pathogenic.                                                                                                            |
| 2  | TE12   | Stop gained | 18.5%  | p.L882*            | NM_001127208.2:c.2581T>A     | 4          | 106157684     | 969      | 789           | 180         |             | This frameshift alteration has not been previously reported to our knowledge, but it is expected to be pathogenic.                                                                                                            |
| 3  | ASXL1  | Stop gained | 5.4%   | p.E865*            | NM_015338.6:c.2593G>T        | 20         | 31023108      | 1307     | 1237          | 70          |             | This frameshift alteration has not been previously reported to our knowledge, but it is expected to be pathogenic.                                                                                                            |
| 4  | TERT   | Promoter    | 9.0%   | promotor c.-124C>T | NM_198253.3:c.-124C>T        | 5          | 1295228       | 343      | 312           | 31          |             | MedGen UID: 1389413                                                                                                                                                                                                           |
| 5  | TP53   | Missense    | 8.40%  | p.R248W            | NM_000546.5:c.742C>T         | 17         | 7577539       | 869      | 769           | 73          |             | COSMIC ID: COSV/5266205                                                                                                                                                                                                       |
|    | FGFR2  | Missense    | 6.9%   | G552R              | NM_000141.4:c.1654G>A        | 10         | 123258027     | 538      | 500           | 38          |             | This missense variant, located in the protein kinase domain, has not been previously reported or functionally characterized in the scientific literature to our knowledge. Therefore, its clinical significance is uncertain. |
| 6  | TE12   | Stop gained | 29%    | p.W1847*           | NM_001127208.2:c.5541G>A     | 4          | 106197208     | 1304     | 926           | 378         |             | COSMIC ID: COSV/54399228                                                                                                                                                                                                      |
|    | KMT2D  | Frameshift  | 32%    | p.E4438Gfs*45      | NM_003482.3:c.13313_13323del | 12         | 49425164      | 1362     | 926           | 436         |             | This missense alteration has not been previously reported or functionally characterized in the scientific literature to our knowledge. Therefore, its clinical significance is uncertain.                                     |
| 7  | TE12   | Missense    | 8.8%   | p.H1881R           | NM_001127208.2:c.5642A>G     | 4          | 106197309     | 1019     | 929           | 90          |             | COSMIC ID: COSV/54397947                                                                                                                                                                                                      |
| 8  | STAT3  | Missense    | 21.9%  | p.Y640F            | NM_138276.2:c.1919A>T        | 17         | 40474482      | 914      | 714           | 200         |             | COSMIC ID: COSV/52892807                                                                                                                                                                                                      |
| 9  | IDH2   | Missense    | 1.4%   | p.R140Q            | NM_002168.3:c.419G>A         | 15         | 90631934      | 651      | 451           | 10          |             | COSMIC ID: COSV/57468751                                                                                                                                                                                                      |
|    | DNMT3A | Missense    | 15.2%  | p.G654V            | NM_022552.4:c.1961G>T        | 2          | 25464552      | 929      | 787           | 142         |             | This missense alteration has not been previously reported or functionally characterized in the scientific literature to our knowledge. Therefore, its clinical significance is uncertain.                                     |
| 10 | PPM1D  | Frameshift  | 16.1%  | p.F534*            | NM_003620.4:c.1599_1611del   | 17         | 58740692      | 1273     | 1068          | 205         |             | This missense alteration has not been previously reported or functionally characterized in the scientific literature to our knowledge. Therefore, its clinical significance is uncertain.                                     |
| 11 | TP53   | Missense    | 9.3%   | p.Y234C            | NM_000546.5:c.701A>G         | 17         | 7577580       | 503      | 456           | 47          |             | COSMIC ID: COSV/52661201                                                                                                                                                                                                      |
| 12 | PPM1D  | Stop gained | 6.30%  | p.R552*            | NM_003620.4:c.1654C>T        | 17         | 58740749      | 1178     | 1104          | 74          |             | COSMIC ID: COSV/59964404                                                                                                                                                                                                      |
| 13 | IDH1   | Missense    | 1.0%   | p.R132H*           | NM_005896.3:c.395G>A         | 2          | 209113112     | 668      | 661           | 7           |             | COSMIC ID: COSV/61615239                                                                                                                                                                                                      |
| 14 | ASXL1  | Frameshift  | 19.1   | p.G646Vfs*12       | NM_015338.6:c.1934dup        | 20         | 31022441      | 1240     | 1003          | 237         |             | COSMIC ID: COSV/61012155                                                                                                                                                                                                      |
|    | UZAF1  | Missense    | 25.40% | p.Q157P            | NM_006158.2:c.470A>C         | 21         | 44514777      | 7221     | 538           | 183         |             | COSMIC ID: COSV/52341120                                                                                                                                                                                                      |
| 15 | DNMT3A | Missense    | 9.0%   | G688R              | NM_022552.4:c.2053G>A        | 2          | 25464460      | 781      | 711           | 70          |             | COSMIC ID: COSV/53038183                                                                                                                                                                                                      |
| 16 | PTEN   | Missense    | 7.00%  | P354L              | NM_000314.8:c.1061C>T        | 10         | 88725078      | 781      | 711           | 55          |             | COSMIC ID: COSV/64294840                                                                                                                                                                                                      |
| 17 | IDH2   | Missense    | 11.0%  | p.R140Q            | NM_002168.3:c.419G>A         | 15         | 90631934      | 839      | 736           | 76          |             | COSMIC ID: COSV/57468751                                                                                                                                                                                                      |

**Supplemental Table 2: Nonsynonymous alterations seen in non-WTC exposed firefighter controls responders: A total of 19 mutations were seen in 16 subjects.**

**Supplemental Table 3: Blood counts in WTC-exposed first responders:** Presence of mutations does not appear to correlate with cytopenias as both groups have no significant cytopenias. 481 cases with available blood counts were included in analysis.

|                                | <b>Mutation Negative Cohort</b><br>Median (Q1, Q3)<br>(N=433) | <b>Mutation Positive Cohort</b><br>Median (Q1, Q3)<br>(N=48) |
|--------------------------------|---------------------------------------------------------------|--------------------------------------------------------------|
| <b>Hemoglobin (g/dL)</b>       | 14.8 (14.2, 15.4)                                             | 14.7 (13.8, 15.6)                                            |
| <b>Platelets (k/uL)</b>        | 218.0 (175.5, 256.0)                                          | 221.5 (170.5, 259.0)                                         |
| <b>WBC (k/uL)</b>              | 6.1 (5.0, 7.6)                                                | 6.8 (5.4, 7.9)                                               |
| <b>Neutrophil Count (k/uL)</b> | 3718.0 (2952.0, 4802.0)                                       | 4246.0 (3157.5, 5462.5)                                      |

n=1 participant without a mutation were missing platelet counts

**Supplemental Table 4: Antibodies used for FACS analysis.**

| <b>Antibody-Fluorophore</b>             | <b>Clone</b> | <b>Final Dilution</b> |
|-----------------------------------------|--------------|-----------------------|
| Gr1 - PE                                | RB6-8C5      | 1:100                 |
| CD4 - PE-Cy5                            | GK1.5        | 1:100                 |
| CD8 $\alpha$ - PE-Cy5                   | 53-6.7       | 1:100                 |
| B220 - PE-Cy5                           | RA3-6B2      | 1:100                 |
| CD19 - PE-Cy5                           | eBio1D3      | 1:100                 |
| Ter119 PE-Cy5                           | TER-119      | 1:100                 |
| Sca1 – BV421 (PB)                       | D7           | 1:100                 |
| c-kit - APC                             | 2B8          | 1:100                 |
| CD34 - FITC                             | RAM34        | 1:100                 |
| Fc $\gamma$ R II/III (CD16/32) – PE-Cy7 | 93           | 1:100                 |
